# Supplementary material for: Examining user fee reductions in public primary healthcare facilities in Kenya, 1997–2012: effects on the use and content of antenatal care
Source: Springer Nature journal article supplement (doi:10.1186/s12939-020-1150-8), 2020-03-14
Supplement: MOESM1 [file 17799316]

**APPENDIX 1: STUDY SAMPLE SIZES**

| Half-year | TOTAL SAMPLE                                |                                   |                                                |                                                            |
|-----------|---------------------------------------------|-----------------------------------|------------------------------------------------|------------------------------------------------------------|
|           | All most recent births, weighted (N=14,901) | 1+ ANC users, weighted (N=13,962) | Public facility ANC users, weighted (N=11,183) | Public primary care facility ANC users, weighted (N=7,239) |
| 1997h2    | 90                                          | 83                                | 53                                             | 34                                                         |
| 1998h1    | 178                                         | 161                               | 113                                            | 70                                                         |
| 1998h2    | 227                                         | 213                               | 163                                            | 105                                                        |
| 1999h1    | 259                                         | 230                               | 153                                            | 89                                                         |
| 1999h2    | 317                                         | 291                               | 214                                            | 143                                                        |
| 2000h1    | 362                                         | 336                               | 216                                            | 146                                                        |
| 2000h2    | 468                                         | 427                               | 303                                            | 204                                                        |
| 2001h1    | 578                                         | 518                               | 376                                            | 261                                                        |
| 2001h2    | 664                                         | 598                               | 422                                            | 304                                                        |
| 2002h1    | 642                                         | 561                               | 390                                            | 275                                                        |
| 2002h2    | 267                                         | 239                               | 181                                            | 125                                                        |
| 2003h1    | 65                                          | 59                                | 51                                             | 21                                                         |
| 2003h2    | 176                                         | 160                               | 136                                            | 73                                                         |
| 2004h1    | 216                                         | 198                               | 167                                            | 121                                                        |
| 2004h2    | 251                                         | 231                               | 186                                            | 123                                                        |
| 2005h1    | 301                                         | 287                               | 236                                            | 157                                                        |
| 2005h2    | 456                                         | 421                               | 351                                            | 247                                                        |
| 2006h1    | 448                                         | 424                               | 336                                            | 226                                                        |
| 2006h2    | 547                                         | 506                               | 414                                            | 266                                                        |
| 2007h1    | 575                                         | 534                               | 443                                            | 263                                                        |
| 2007h2    | 613                                         | 562                               | 473                                            | 322                                                        |
| 2008h1    | 326                                         | 298                               | 251                                            | 175                                                        |
| 2008h2    | 118                                         | 116                               | 108                                            | 52                                                         |
| 2009h1    | 365                                         | 341                               | 290                                            | 153                                                        |
| 2009h2    | 467                                         | 457                               | 363                                            | 210                                                        |
| 2010h1    | 507                                         | 492                               | 401                                            | 239                                                        |
| 2010h2    | 620                                         | 600                               | 486                                            | 302                                                        |
| 2011h1    | 664                                         | 645                               | 533                                            | 342                                                        |
| 2011h2    | 802                                         | 774                               | 625                                            | 406                                                        |
| 2012h1    | 848                                         | 826                               | 695                                            | 449                                                        |

| Half-year | NON-WEALTHY SAMPLE                         |                                  |                                               |                                                            |
|-----------|--------------------------------------------|----------------------------------|-----------------------------------------------|------------------------------------------------------------|
|           | All most recent births, weighted (N=8,793) | 1+ ANC users, weighted (N=8,065) | Public facility ANC users, weighted (N=6,771) | Public primary care facility ANC users, weighted (N=4,986) |
| 1997h2    | 46                                         | 40                               | 29                                            | 23                                                         |
| 1998h1    | 98                                         | 82                               | 58                                            | 35                                                         |
| 1998h2    | 121                                        | 109                              | 92                                            | 62                                                         |
| 1999h1    | 145                                        | 126                              | 84                                            | 53                                                         |
| 1999h2    | 181                                        | 159                              | 116                                           | 74                                                         |
| 2000h1    | 222                                        | 201                              | 122                                           | 91                                                         |
| 2000h2    | 296                                        | 266                              | 196                                           | 143                                                        |
| 2001h1    | 367                                        | 316                              | 227                                           | 178                                                        |
| 2001h2    | 430                                        | 378                              | 275                                           | 218                                                        |
| 2002h1    | 410                                        | 353                              | 236                                           | 186                                                        |
| 2002h2    | 159                                        | 136                              | 102                                           | 76                                                         |
| 2003h1    | 22                                         | 19                               | 15                                            | 8                                                          |
| 2003h2    | 74                                         | 69                               | 60                                            | 42                                                         |
| 2004h1    | 108                                        | 99                               | 84                                            | 69                                                         |
| 2004h2    | 130                                        | 114                              | 100                                           | 71                                                         |
| 2005h1    | 158                                        | 147                              | 128                                           | 96                                                         |
| 2005h2    | 290                                        | 271                              | 239                                           | 180                                                        |
| 2006h1    | 270                                        | 251                              | 215                                           | 165                                                        |
| 2006h2    | 324                                        | 295                              | 244                                           | 190                                                        |
| 2007h1    | 360                                        | 324                              | 283                                           | 197                                                        |
| 2007h2    | 400                                        | 363                              | 318                                           | 237                                                        |
| 2008h1    | 212                                        | 187                              | 163                                           | 123                                                        |
| 2008h2    | 61                                         | 59                               | 58                                            | 35                                                         |
| 2009h1    | 164                                        | 151                              | 135                                           | 85                                                         |
| 2009h2    | 219                                        | 212                              | 193                                           | 131                                                        |
| 2010h1    | 269                                        | 257                              | 222                                           | 165                                                        |
| 2010h2    | 331                                        | 315                              | 281                                           | 205                                                        |
| 2011h1    | 373                                        | 357                              | 319                                           | 225                                                        |
| 2011h2    | 465                                        | 443                              | 402                                           | 302                                                        |
| 2012h1    | 507                                        | 486                              | 435                                           | 327                                                        |

| Half-year | WEALTHY SAMPLE                             |                                  |                                              |                                                            |
|-----------|--------------------------------------------|----------------------------------|----------------------------------------------|------------------------------------------------------------|
|           | All most recent births, weighted (N=6,108) | 1+ ANC users, weighted (N=5,897) | Public facility ANC users, weighted (N=4412) | Public primary care facility ANC users, weighted (N=2,253) |
| 1997h2    | 44                                         | 42                               | 24                                           | 11                                                         |
| 1998h1    | 79                                         | 79                               | 54                                           | 36                                                         |
| 1998h2    | 106                                        | 103                              | 71                                           | 43                                                         |
| 1999h1    | 114                                        | 105                              | 69                                           | 36                                                         |
| 1999h2    | 137                                        | 132                              | 98                                           | 69                                                         |
| 2000h1    | 141                                        | 135                              | 93                                           | 56                                                         |
| 2000h2    | 171                                        | 160                              | 108                                          | 61                                                         |
| 2001h1    | 210                                        | 201                              | 148                                          | 83                                                         |
| 2001h2    | 234                                        | 220                              | 147                                          | 86                                                         |
| 2002h1    | 232                                        | 208                              | 154                                          | 89                                                         |
| 2002h2    | 108                                        | 103                              | 78                                           | 49                                                         |
| 2003h1    | 43                                         | 40                               | 35                                           | 12                                                         |
| 2003h2    | 101                                        | 92                               | 77                                           | 32                                                         |
| 2004h1    | 108                                        | 100                              | 83                                           | 52                                                         |
| 2004h2    | 121                                        | 117                              | 86                                           | 52                                                         |
| 2005h1    | 143                                        | 140                              | 108                                          | 61                                                         |
| 2005h2    | 166                                        | 150                              | 112                                          | 68                                                         |
| 2006h1    | 178                                        | 173                              | 122                                          | 60                                                         |
| 2006h2    | 222                                        | 211                              | 170                                          | 76                                                         |
| 2007h1    | 215                                        | 210                              | 160                                          | 67                                                         |
| 2007h2    | 213                                        | 199                              | 154                                          | 85                                                         |
| 2008h1    | 115                                        | 110                              | 88                                           | 52                                                         |
| 2008h2    | 57                                         | 57                               | 50                                           | 17                                                         |
| 2009h1    | 201                                        | 190                              | 155                                          | 69                                                         |
| 2009h2    | 248                                        | 245                              | 170                                          | 79                                                         |
| 2010h1    | 238                                        | 235                              | 178                                          | 74                                                         |
| 2010h2    | 289                                        | 285                              | 205                                          | 97                                                         |
| 2011h1    | 291                                        | 288                              | 214                                          | 117                                                        |
| 2011h2    | 336                                        | 332                              | 223                                          | 104                                                        |
| 2012h1    | 341                                        | 340                              | 260                                          | 122                                                        |
