# Supplementary material for: Examining user fee reductions in public primary healthcare facilities in Kenya, 1997–2012: effects on the use and content of antenatal care
Source: Springer Nature journal article supplement (doi:10.1186/s12939-020-1150-8), 2020-03-14
Supplement: MOESM2 [file 17799316]

## APPENDIX 2: Study outcomes stratified by rural/urban residence

**Table A2.1 Use of 4+ ANC among most recent births**

|                               | 4+ ANC (all women)      |         | 4+ ANC (rural)          |         | 4+ ANC (urban)         |         |
|-------------------------------|-------------------------|---------|-------------------------|---------|------------------------|---------|
|                               | Estimate<br>[95% CI]    | p-value | Estimate<br>[95% CI]    | p-value | Estimate<br>[95% CI]   | p-value |
| Pre-policy starting level     | 62.3%<br>[57.4%,67.1%]  |         | 56.1%<br>[50.1%,62.1%]  |         | 84.0%<br>[78.7%,89.2%] |         |
| Pre-policy half-yearly trend  | -1.2%<br>[-2.2%,-0.3%]  | 0.009   | -0.9%<br>[-1.9%,0.2%]   | 0.096   | -2.3%<br>[-3.1%,-1.6%] | <0.001  |
| Immediate change in level     | +0.3%<br>[-11.8%,12.3%] | 0.965   | -2.1%<br>[-14.3%,10.2%] | 0.730   | +11.4%<br>[2.0%,20.7%] | 0.019   |
| Immediate change in slope     | +2.4%<br>[1.1%,3.6%]    | 0.001   | +1.8%<br>[0.5%,3.1%]    | 0.010   | +2.9%<br>[2.0%,3.9%]   | <0.001  |
| Post-policy half-yearly trend | +1.1%<br>[0.4%,1.8%]    | 0.003   | +0.9%<br>[0.2%,1.5%]    | 0.009   | +0.6%<br>[0.0%,1.2%]   | 0.061   |

**Table A2.2: Early ANC initiation among users of 1+ ANC**

|                               | Early ANC (all women)  |         | Early ANC (rural)     |         | Early ANC (urban)      |         |
|-------------------------------|------------------------|---------|-----------------------|---------|------------------------|---------|
|                               | Estimate<br>[95% CI]   | p-value | Estimate<br>[95% CI]  | p-value | Estimate<br>[95% CI]   | p-value |
| Pre-policy starting level     | 14.0%<br>[10.2%,17.9%] |         | 10.7%<br>[6.9%,14.6%] |         | 23.0%<br>[18.4%,27.6%] |         |
| Pre-policy half-yearly trend  | -0.3%<br>[-0.9%,0.3%]  | 0.355   | 0.0%<br>[-0.5%,0.6%]  | 0.899   | -1.0%<br>[-1.8%,-0.2%] | 0.019   |
| Immediate change in level     | +2.6%<br>[-2.5%,7.6%]  | 0.303   | +0.1%<br>[-4.6%,4.9%] | 0.957   | +6.0%<br>[-3.0%,15.0%] | 0.185   |
| Immediate change in slope     | +1.0%<br>[0.3%,1.7%]   | 0.008   | +0.4%<br>[-0.2%,1.1%] | 0.215   | +2.1%<br>[0.9%,3.2%]   | 0.001   |
| Post-policy half-yearly trend | +0.7%<br>[0.5%,0.9%]   | <0.001  | +0.4%<br>[0.2%,0.7%]  | 0.001   | +1.1%<br>[0.4%,1.7%]   | 0.002   |

**Table A2.3: Use of ANC from a public sector health facility among users of 1+ ANC**

|                               | Any public facility<br>(all women) |         | Any public facility<br>(rural) |         | Any public facility<br>(urban) |         |
|-------------------------------|------------------------------------|---------|--------------------------------|---------|--------------------------------|---------|
|                               | Estimate<br>[95% CI]               | p-value | Estimate<br>[95% CI]           | p-value | Estimate<br>[95% CI]           | p-value |
| Pre-policy starting level     | 66.0%<br>[59.6%,72.4%]             |         | 65.1%<br>[56.5%,73.6%]         |         | 64.8%<br>[58.4%,71.2%]         |         |
| Pre-policy half-yearly trend  | +1.0%<br>[0.0%,2.0%]               | 0.044   | +1.2%<br>[0.0%,2.5%]           | 0.050   | +1.2%<br>[0.1%,2.4%]           | 0.031   |
| Immediate change in level     | +3.0%<br>[-6.1%,12.1%]             | 0.499   | +2.6%<br>[-8.1%,13.3%]         | 0.623   | -4.1%<br>[-16.7%,8.5%]         | 0.507   |
| Immediate change in slope     | -1.0%<br>[-2.0%,0.0%]              | 0.042   | -0.9%<br>[-2.2%,0.3%]          | 0.129   | -1.4%<br>[-2.7%,-0.2%]         | 0.023   |
| Post-policy half-yearly trend | 0.0%<br>[-0.2%,0.2%]               | 0.976   | +0.3%<br>[0.1%,0.5%]           | 0.007   | -0.2%<br>[-0.8%,0.4%]          | 0.502   |

## APPENDIX 2: Study outcomes stratified by rural/urban residence

**Table A2.4: Use of primary care facility among users of public facility-based ANC**

|                               | Primary care facility<br>(all women) |         | Primary care facility<br>(rural) |         | Primary care facility<br>(urban) |         |
|-------------------------------|--------------------------------------|---------|----------------------------------|---------|----------------------------------|---------|
|                               | Estimate<br>[95% CI]                 | p-value | Estimate<br>[95% CI]             | p-value | Estimate<br>[95% CI]             | p-value |
| Pre-policy starting level     | 64.5%<br>[59.2%,69.8%]               |         | 69.4%<br>[63.7%,75.1%]           |         | 49.0%<br>[33.3%,64.7%]           |         |
| Pre-policy half-yearly trend  | +0.4%<br>[-0.5%,1.4%]                | 0.356   | +0.4%<br>[-0.5%,1.2%]            | 0.387   | +0.1%<br>[-2.2%,2.4%]            | 0.917   |
| Immediate change in level     | -4.7%<br>[-14.6%, 5.2%]              | 0.335   | -3.1%<br>[-10.2,4.0%]            | 0.376   | -13.0%<br>[-36.4%,10.4%]         | 0.263   |
| Immediate change in slope     | -0.7%<br>[-1.7%,0.4%]                | 0.193   | -0.2%<br>[-1.0%,0.6%]            | 0.645   | +0.3%<br>[-2.3%,2.9%]            | 0.800   |
| Post-policy half-yearly trend | -0.2%<br>[-0.7%,0.2%]                | 0.247   | +0.2%<br>[0.0%,0.3%]             | 0.042   | +0.4%<br>[-0.7%,1.6%]            | 0.440   |

**Table A2.5: Received good content of care among users of public facility-based ANC**

|                               | Received all 6 routine<br>ANC components<br>(all women) |         | Received all 6 routine<br>ANC components<br>(rural) |         | Received all 6 routine<br>ANC components<br>(urban) |         |
|-------------------------------|---------------------------------------------------------|---------|-----------------------------------------------------|---------|-----------------------------------------------------|---------|
|                               | Estimate<br>[95% CI]                                    | p-value | Estimate<br>[95% CI]                                | p-value | Estimate<br>[95% CI]                                | p-value |
| Pre-policy starting level     | 9.4%<br>[4.7%,14.2%]                                    |         | 7.5%<br>[3.0%,12.0%]                                |         | 13.4%<br>[6.4%,20.4%]                               |         |
| Pre-policy half-yearly trend  | +0.4%<br>[-0.6%,1.4%]                                   | 0.402   | +0.4%<br>[-0.5%,1.3%]                               | 0.353   | +0.7%<br>[-0.8%,2.3%]                               | 0.335   |
| Immediate change in level     | +4.9%<br>[-4.9%,14.6%]                                  | 0.313   | +3.9%<br>[-4.6%,12.5%]                              | 0.350   | +8.0%<br>[-9.2%,25.3%]                              | 0.347   |
| Immediate change in slope     | +1.1%<br>[-0.2%,2.3%]                                   | 0.087   | +0.8%<br>[-0.3%,1.9%]                               | 0.162   | +0.7%<br>[-0.8%,2.1%]                               | 0.337   |
| Post-policy half-yearly trend | +1.5%<br>[1.0%,2.0%]                                    | <0.001  | +1.2%<br>[0.7%,1.7%]                                | <0.001  | +1.4%<br>[1.0%,1.9%]                                | <0.001  |

## APPENDIX 2: Study outcomes stratified by rural/urban residence

**Table A2.6: Summary of the impact of the 10/20 policy on ANC**

|                                                                                   | Immediate change in level | Immediate change in slope |
|-----------------------------------------------------------------------------------|---------------------------|---------------------------|
| <b>(2) 4+ ANC (most recent births)</b>                                            |                           |                           |
| All women                                                                         | none                      | increased                 |
| Rural                                                                             | none                      | increased                 |
| Urban                                                                             | increased                 | increased                 |
| <b>(3) Early ANC (users of 1+ ANC)</b>                                            |                           |                           |
| All women                                                                         | none                      | increased                 |
| Rural                                                                             | none                      | none                      |
| Urban                                                                             | none                      | increased                 |
| <b>(4) Public facility-based ANC (users of 1+ ANC)</b>                            |                           |                           |
| All women                                                                         | none                      | decreased                 |
| Rural                                                                             | none                      | none                      |
| Urban                                                                             | none                      | decreased                 |
| <b>(5) Public primary care facility (users of any public facility-based care)</b> |                           |                           |
| All women                                                                         | none                      | none                      |
| Rural                                                                             | none                      | none                      |
| Urban                                                                             | none                      | none                      |
| <b>(6) Received good content of ANC (users of any public facility-based care)</b> |                           |                           |
| All women                                                                         | none                      | none                      |
| Rural                                                                             | none                      | none                      |
| Urban                                                                             | none                      | none                      |
| increased: increasing effect or trend, $p < 0.05$                                 |                           |                           |
| decreased: decreasing effect or trend, $p < 0.05$                                 |                           |                           |
| none: no effect, $p > 0.10$                                                       |                           |                           |
