# Supplementary material for: Examining user fee reductions in public primary healthcare facilities in Kenya, 1997–2012: effects on the use and content of antenatal care
Source: Springer Nature journal article supplement (doi:10.1186/s12939-020-1150-8), 2020-03-14
Supplement: MOESM3 [file 17799316]

### ADDITIONAL FILE 3: MEAN GESTATIONAL AGE CALCULATIONS

| <b>(1)%Births that are pre-term in sub-Saharan Africa*</b>                           |                              |                                                                       |                                            |                                    |
|--------------------------------------------------------------------------------------|------------------------------|-----------------------------------------------------------------------|--------------------------------------------|------------------------------------|
|                                                                                      | 12.30%                       |                                                                       |                                            |                                    |
|                                                                                      |                              |                                                                       |                                            |                                    |
| <b>(2) Distribution of pre-term births by gestational age in sub-Saharan Africa*</b> |                              |                                                                       |                                            |                                    |
|                                                                                      |                              | <b>Gestational age</b>                                                |                                            |                                    |
|                                                                                      | <b>All preterm births</b>    | <b>&lt;28 weeks</b>                                                   | <b>28 to &lt;32 weeks</b>                  | <b>32 to &lt;37 weeks</b>          |
| <b>No. births</b>                                                                    | 3,933,200                    | 204,700                                                               | 409,500                                    | 3,319,000                          |
| <b>%pre-term births</b>                                                              | 100.0%                       | 5.2%                                                                  | 10.4%                                      | 84.4%                              |
|                                                                                      |                              |                                                                       |                                            |                                    |
| <b>(3) Calculating median gestational age in sub-Saharan Africa</b>                  |                              |                                                                       |                                            |                                    |
|                                                                                      |                              |                                                                       |                                            |                                    |
|                                                                                      | <b>Gestational age range</b> | <b>(A)<br/>%births occurring<br/>during gestational<br/>age range</b> | <b>(B)<br/>Median<br/>gestational age</b>  | <b>(A * B)<br/>weight X median</b> |
| <b>full-term<br/>87.7%<br/>of all births</b>                                         | 37 to <42 weeks              | 87.7%                                                                 | 39                                         | 34.2                               |
| <b>pre-term<br/>12.3%<br/>of all births</b>                                          | 32 to <37 weeks              | 10.4%                                                                 | 34                                         | 3.5                                |
|                                                                                      | 28 to <32 weeks              | 1.3%                                                                  | 29.5                                       | 0.4                                |
|                                                                                      | 22 to <28 weeks              | 0.6%                                                                  | 24.5                                       | 0.2                                |
|                                                                                      |                              |                                                                       | <b>weighted median<br/>gestational age</b> | <b>38.3</b>                        |
|                                                                                      |                              |                                                                       |                                            |                                    |

*\*Estimates from: Blencowe H, Cousens S, Chou D, et al. Born Too Soon: The global epidemiology of 15 million preterm births. Reprod Health 2013;10:1–14. doi:10.1186/1742-4755-10-S1-S2*
