# Supplementary material for: Examining user fee reductions in public primary healthcare facilities in Kenya, 1997–2012: effects on the use and content of antenatal care
Source: Int J Equity Health. 2020 Mar 14;19:35. doi: 10.1186/s12939-020-1150-8 (PMC7073011; doi:10.1186/s12939-020-1150-8)
Supplement: Supplementary file 5 — Additional file 5. Receipt of individual ANC components. [file 12939_2020_1150_MOESM5_ESM.pdf]

## APPENDIX 5

Table A5.1: Receipt of six routine ANC components by facility type before and after introduction of the 10/20 policy

|                             | Blood pressure measured | Urine sample taken | Blood sample taken | Received tetanus injection | Given iron supplements | Told about pregnancy complications | Received all six components |
|-----------------------------|-------------------------|--------------------|--------------------|----------------------------|------------------------|------------------------------------|-----------------------------|
| <b>Public hospital</b>      |                         |                    |                    |                            |                        |                                    |                             |
| Before 10/20                | 91.0%                   | 71.6%              | 80.5%              | 96.7%                      | 50.2%                  | 45.9%                              | 21.5%                       |
| After 10/20                 | 94.1%                   | 87.9%              | 94.3%              | 96.0%                      | 74.0%                  | 56.5%                              | 39.5%                       |
| <b>Public health center</b> |                         |                    |                    |                            |                        |                                    |                             |
| Before 10/20                | 80.6%                   | 46.6%              | 56.7%              | 96.1%                      | 48.2%                  | 36.1%                              | 11.6%                       |
| After 10/20                 | 87.6%                   | 78.6%              | 91.0%              | 94.2%                      | 72.6%                  | 51.4%                              | 33.9%                       |
| <b>Public dispensary</b>    |                         |                    |                    |                            |                        |                                    |                             |
| Before 10/20                | 76.6%                   | 37.6%              | 44.7%              | 95.0%                      | 54.2%                  | 27.6%                              | 9.7%                        |
| After 10/20                 | 86.0%                   | 69.5%              | 85.8%              | 95.0%                      | 71.2%                  | 44.5%                              | 25.8%                       |
| <b>Private facility</b>     |                         |                    |                    |                            |                        |                                    |                             |
| Before 10/20                | 89.9%                   | 54.1%              | 58.9%              | 94.0%                      | 57.3%                  | 39.2%                              | 13.4%                       |
| After 10/20                 | 95.3%                   | 85.4%              | 91.8%              | 95.0%                      | 74.9%                  | 57.9%                              | 41.6%                       |
| <b>Home/other location</b>  |                         |                    |                    |                            |                        |                                    |                             |
| Before 10/20                | 32.4%                   | 22.2%              | 25.9%              | 41.3%                      | 22.7%                  | 33.3%                              | 7.5%                        |
| After 10/20                 | 59.5%                   | 32.3%              | 48.6%              | 67.5%                      | 48.9%                  | 27.2%                              | 11.6%                       |

Table A5.2: Receipt of ANC components by number of visits before and after the introduction of the 10/20 policy

|                   | Blood pressure measured | Urine sample taken | Blood sample taken | Received tetanus injection | Given iron supplements | Told about pregnancy complications | Received all six components |
|-------------------|-------------------------|--------------------|--------------------|----------------------------|------------------------|------------------------------------|-----------------------------|
| <b>1-3 visits</b> |                         |                    |                    |                            |                        |                                    |                             |
| Before 10/20      | 77.1%                   | 42.5%              | 49.5%              | 92.3%                      | 48.9%                  | 31.2%                              | 9.6%                        |
| After 10/20       | 85.1%                   | 70.1%              | 85.2%              | 92.7%                      | 67.5%                  | 41.8%                              | 24.5%                       |
| <b>4-7 visits</b> |                         |                    |                    |                            |                        |                                    |                             |
| Before 10/20      | 86.9%                   | 56.3%              | 64.8%              | 95.8%                      | 52.6%                  | 39.8%                              | 14.9%                       |
| After 10/20       | 93.3%                   | 85.4%              | 93.6%              | 96.2%                      | 76.1%                  | 58.5%                              | 40.5%                       |
| <b>8+ visits</b>  |                         |                    |                    |                            |                        |                                    |                             |
| Before 10/20      | 93.0%                   | 68.8%              | 76.8%              | 94.0%                      | 58.5%                  | 51.9%                              | 24.9%                       |
| After 10/20       | 95.0%                   | 95.5%              | 96.3%              | 96.4%                      | 76.3%                  | 65.2%                              | 49.6%                       |
